# Supplementary material for: Characterization of the DNAM-1, TIGIT and TACTILE Axis on Circulating NK, NKT-Like and T Cell Subsets in Patients with Acute Myeloid Leukemia
Source: Cancers (Basel). 2020 Aug 5;12(8):2171. doi: 10.3390/cancers12082171 (PMC7464787; doi:10.3390/cancers12082171)

## **Supplementary Materials: Characterization of the DNAM-1, TIGIT and TACTILE Axis on Circulating NK, NKT-Like and T Cell Subsets in Patients with Acute Myeloid Leukemia**

Isabel Valhondo, Fakhri Hassouneh, Nelson Lopez-Sejas, Alejandra Pera, Beatriz Sanchez-Correa, Beatriz Guerrero, Juan M. Bergua, Maria Jose Arcos, Helena Bañas, Ignacio Casas-Avilés, Joaquin Sanchez-Garcia, Josefina Serrano, Carmen Martin, Esther Duran, Corona Alonso, Rafael Solana and Raquel Tarazona

### a) Healthy donors

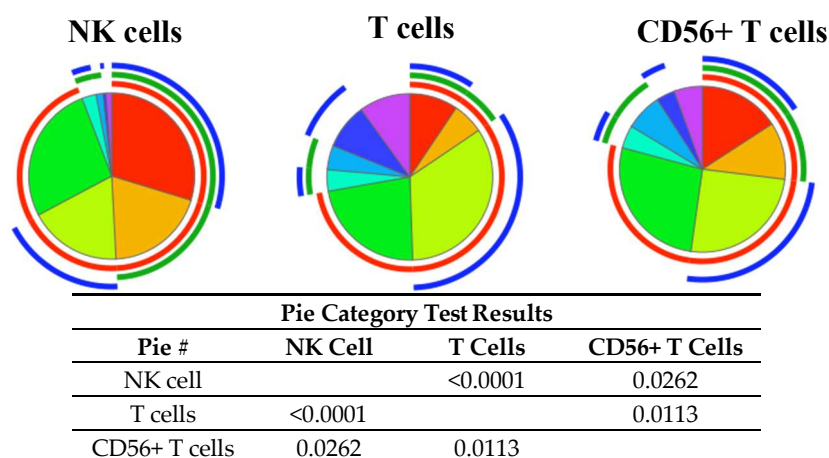

### b) AML patients

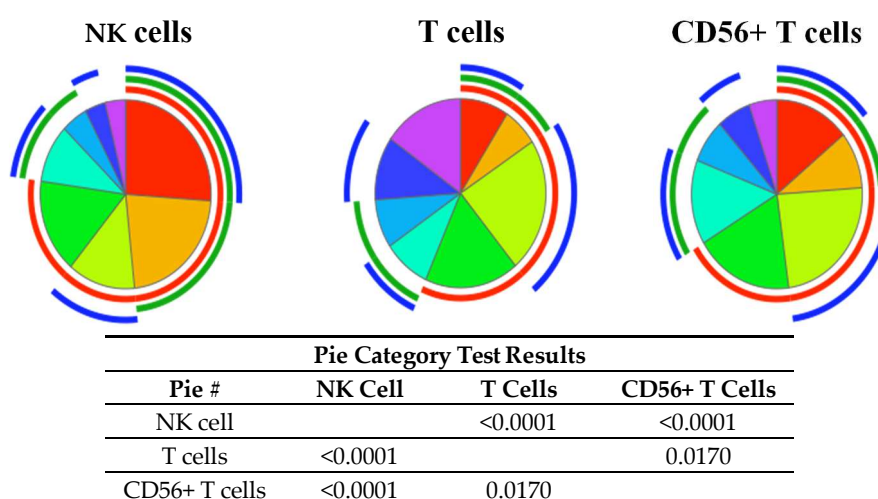

**Figure S1.** Comparison of co-expression patterns of DNAM-1, TIGIT and TACTILE among NK cells, CD56<sup>−</sup> and CD56<sup>+</sup> T cell subsets. Co-expression patterns (pie charts) were analyzed in NK cells, conventional CD56<sup>−</sup> T cells and CD56<sup>+</sup> NKT-like cells in (a) healthy donors ( $n = 20$ ) and (b) AML patients ( $n = 30$ ). The tables below the pie charts correspond to the results of the statistical analysis.

## a) Healthy donors

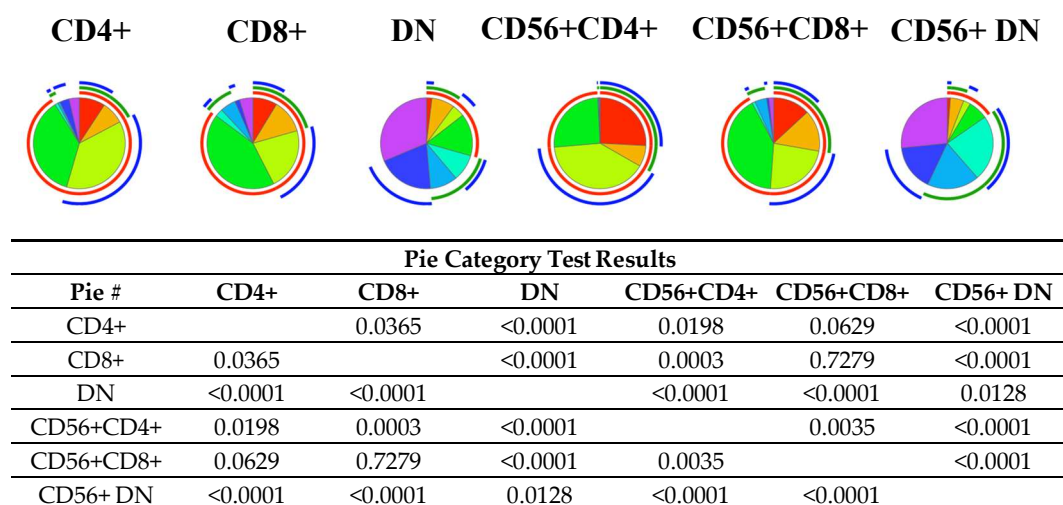

## b) AML patients

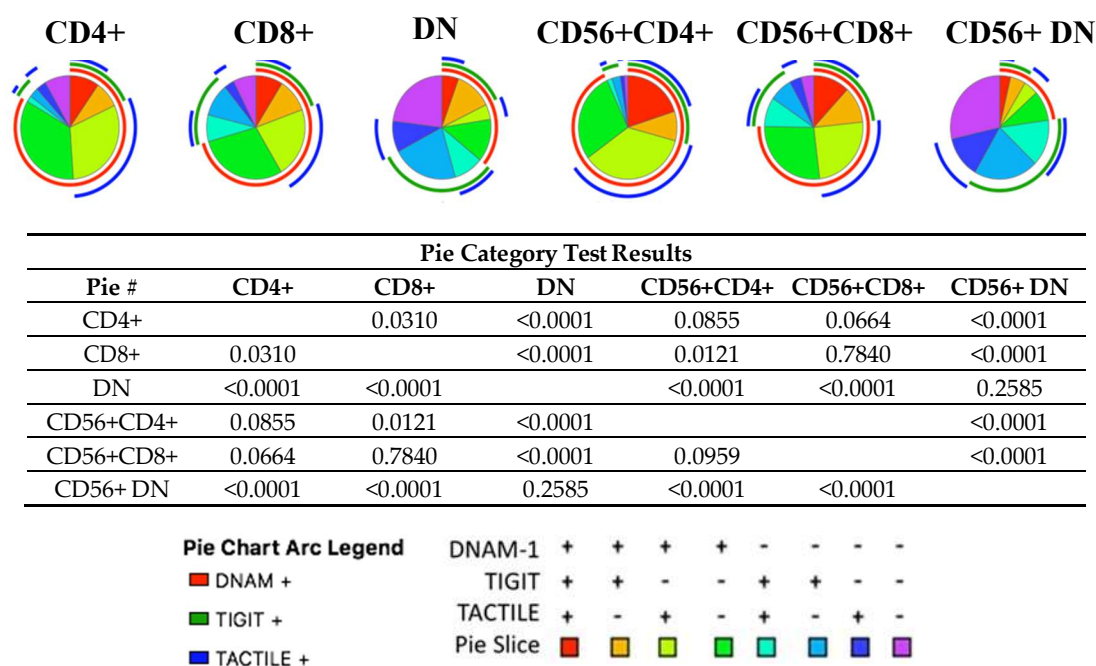

**Figure S2.** Comparison of co-expression patterns of DNAM-1, TIGIT and TACTILE in T cell subsets. Co-expression patterns (pie charts) were analyzed in CD4+, CD8+, and DN (CD4- CD8-, double negative) T cell subsets distributed according to CD56 expression in (a) healthy donors ( $n = 20$ ) and (b) AML patients ( $n = 23$ ). The tables below the pie charts correspond to the results of the statistical analysis.

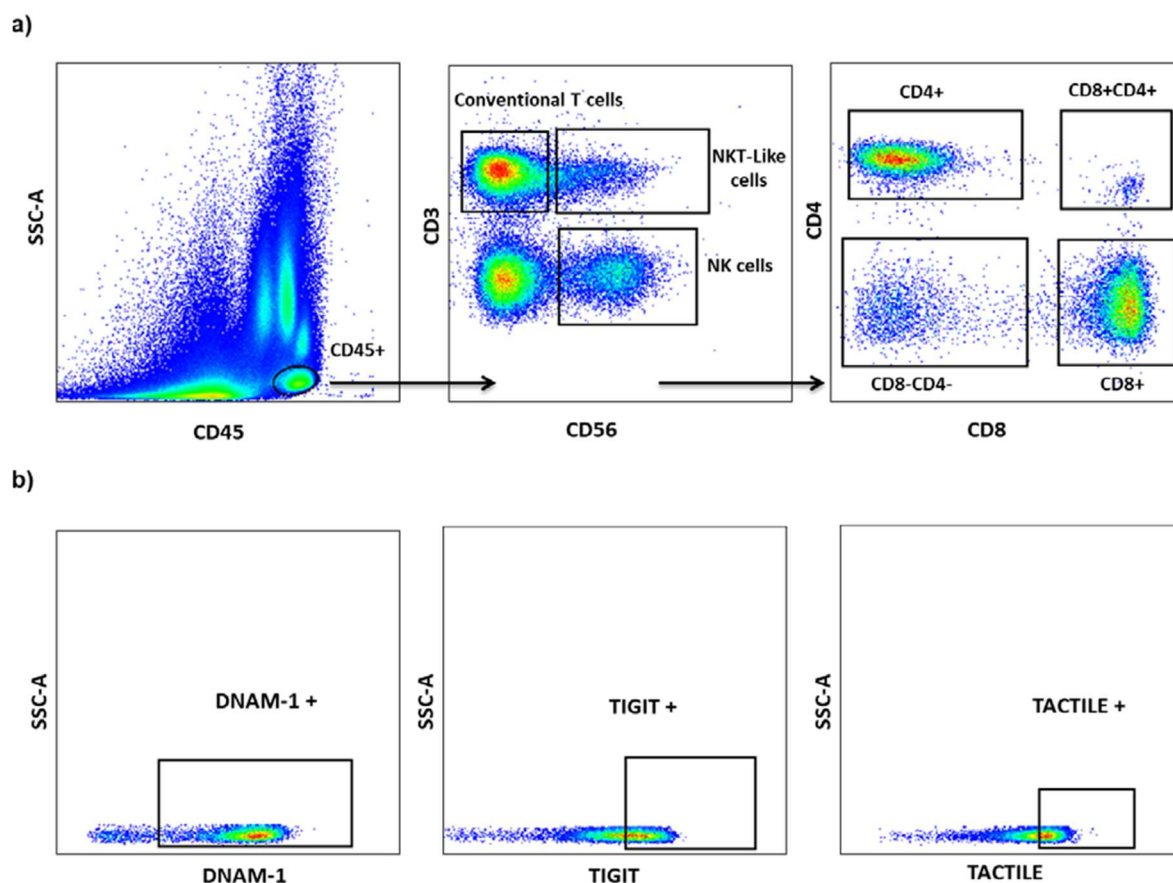

**Figure S3.** Gating strategy used for the analysis of DNAM-1, TIGIT and TACTILE expression on NK cells, CD56<sup>-</sup> T cells and CD56<sup>+</sup> T cells. (a) Lymphocytes were selected according to their expression of CD45, size and granularity (FSC vs. SSC), subsequently NK cells (CD3<sup>-</sup> CD56<sup>+</sup>), NKT-like cells (CD3<sup>+</sup> CD56<sup>+</sup>) and conventional T cells (CD3<sup>+</sup> CD56<sup>-</sup>) were gated by confronting CD56 vs CD3, and followed by the identification of CD4<sup>+</sup>, CD8<sup>+</sup>, CD4<sup>-</sup>CD8<sup>-</sup> cells (DN: Double negative), CD4<sup>+</sup>CD8<sup>+</sup> cells (DP: Double positive). (b) Subsequently, the expression DNAM-1, TIGIT and TACTILE was determined within NK cells (CD3<sup>-</sup> CD56<sup>+</sup>), NKT-like cells (CD3<sup>+</sup> CD56<sup>+</sup>) and conventional T cells (CD3<sup>+</sup> CD56<sup>-</sup>) using Fluorescence minus one (FMO) and isotype controls. Figure shows an example for NK cell.

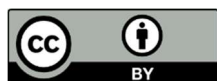

Supplement: Supplementary file 1 [file cancers-12-02171-s001.pdf]
